# Supplementary material for: Construction of dispirocyclohexyl-3,3′-bisoxindole and dispirocyclopentyl-3,3′-bisoxindole via domino cycloaddition reactions of N-benzylbenzimidazolium salts with 2-(2-oxoindolin-3-ylidene)acetates
Source: Royal Society of Chemistry journal article supplement (doi:10.1039/c4ra13760d), 2014-12-08

**Construction of dispirocyclohexyl-3,3'-bisoxindole and dispirocyclopentyl-3,3'-bisoxindole via cycloaddition reactions of *N*-benzylbenzimidazolium salts with 2-(2-oxoindolin-3-ylidene)acetates**

Guo-Liang Shen, Jing Sun, Chao-Guo Yan\*

**Supporting Information**

|                                                                      |             |
|----------------------------------------------------------------------|-------------|
| <b>Figure s1 and s2</b>                                              | <b>2</b>    |
| <b>Crystal data</b>                                                  | <b>3</b>    |
| <b><sup>1</sup>H and <sup>13</sup>C NMR spectra of new compounds</b> | <b>4-23</b> |

Crystallographic data **3f** (CCDC 1029433), **4a** (CCDC 1029434), **4d** (CCDC 1030434) and **4f** (CCDC 1036833) have been deposited at the Cambridge Crystallographic Database Centre.

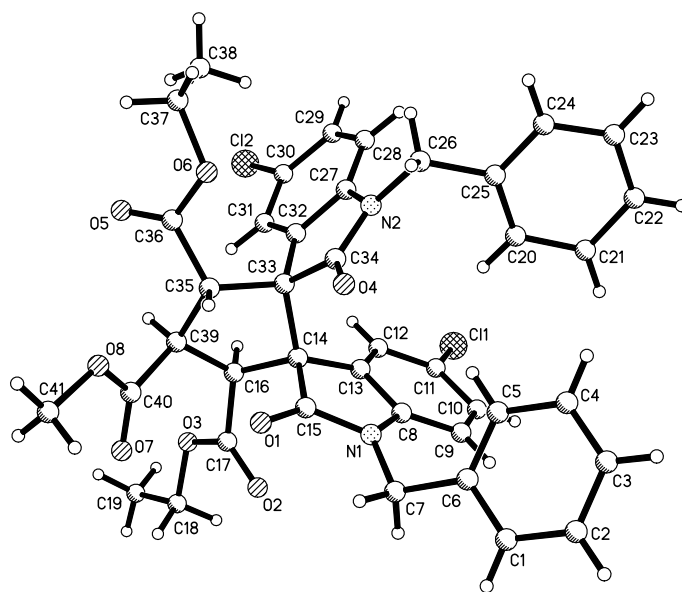

**Fig. s1** Molecular structure of compound **4d**

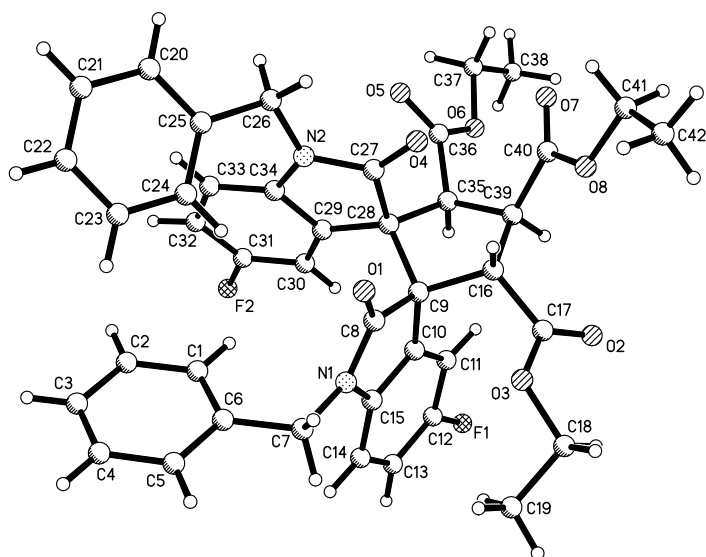

**Fig. s2** Molecular structure of compound **4f**

**Table s1 Crystal data of compounds 3f, 4a, 4d and 4f**

| Phase                                      | 3f                                                                                                                  | 4a                                                            | 4d                                                                            | 4f                                                                           |
|--------------------------------------------|---------------------------------------------------------------------------------------------------------------------|---------------------------------------------------------------|-------------------------------------------------------------------------------|------------------------------------------------------------------------------|
| Empirical formula                          | C <sub>46</sub> H <sub>37</sub> Cl <sub>3</sub> N <sub>2</sub> O <sub>7</sub> ·C <sub>3</sub> H <sub>7</sub> N<br>O | C <sub>41</sub> H <sub>38</sub> N <sub>2</sub> O <sub>8</sub> | C <sub>41</sub> H <sub>36</sub> Cl <sub>2</sub> N <sub>2</sub> O <sub>8</sub> | C <sub>42</sub> H <sub>38</sub> F <sub>2</sub> N <sub>2</sub> O <sub>8</sub> |
| Formula weight                             | 909.22                                                                                                              | 686.73                                                        | 755.62                                                                        | 736.74                                                                       |
| Temperature(K)                             | 296(2)                                                                                                              | 296(2)                                                        | 296(2)                                                                        | 296(2)                                                                       |
| Wavelength/nm                              | 0.71073                                                                                                             | 0.71073                                                       | 0.71073                                                                       | 0.71073                                                                      |
| Crystal system                             | Triclinic                                                                                                           | Triclinic                                                     | Triclinic                                                                     | Triclinic                                                                    |
| space group                                | P -1                                                                                                                | P -1                                                          | P -1                                                                          | P -1                                                                         |
| a (Å)                                      | 11.5355(12)                                                                                                         | 10.740(3)                                                     | 10.8295(16)                                                                   | 10.5612(11)                                                                  |
| b (Å)                                      | 12.0272(13)                                                                                                         | 12.889(3)                                                     | 12.8333(19)                                                                   | 12.8164(13)                                                                  |
| c (Å)                                      | 16.4726(17)                                                                                                         | 15.381(4)                                                     | 15.121(2)                                                                     | 15.0804(16)                                                                  |
| α (°)                                      | 105.258(3)                                                                                                          | 68.745(3)                                                     | 85.481(2)                                                                     | 85.716(3)                                                                    |
| β (°)                                      | 90.346(3)                                                                                                           | 87.060(3)                                                     | 76.954(2)                                                                     | 77.587(3)                                                                    |
| γ (°)                                      | 91.168(3)                                                                                                           | 70.391(3)                                                     | 75.004(2)                                                                     | 76.529(3)                                                                    |
| Volume(Å <sup>3</sup> )                    | 2204.2(4)                                                                                                           | 1863.2(8)                                                     | 1977.1(5)                                                                     | 1938.0(3)                                                                    |
| Z                                          | 2                                                                                                                   | 2                                                             | 2                                                                             | 2                                                                            |
| F(000)                                     | 948                                                                                                                 | 724                                                           | 788                                                                           | 772                                                                          |
| Calc. d. (g·cm <sup>-3</sup> )             | 1.370                                                                                                               | 1.224                                                         | 1.269                                                                         | 1.263                                                                        |
| Absorption coefficient (mm <sup>-1</sup> ) | 0.267                                                                                                               | 0.085                                                         | 0.217                                                                         | 0.094                                                                        |
| θ range (°)                                | 1.28 to 27.59                                                                                                       | 1.43 to 25.00                                                 | 1.38                                                                          | 1.63 to 27.59                                                                |
| Limiting indices                           | -14<=h<=15,<br>-21<=l<=21                                                                                           | -12<=h<=12,<br>-18<=l<=18                                     | -13<=h<=13,<br>-18<=l<=18                                                     | -13<=h<=13,<br>-16<=k<=14,<br>-19<=l<=19                                     |
| Reflections collected / unique             | 46666/10202<br>[R(int)=0.0439]                                                                                      | 12005/6557<br>[R(int)=0.0387]                                 | 113843/7783<br>[R(int)=0.0413]                                                | 25423/ 8762<br>[R(int)=0.0275]                                               |
| Completeness to theta                      | 99.5%                                                                                                               | 95.9%                                                         | 95.2%                                                                         | 97.6%                                                                        |
| Max. and min. transmission                 | 0.923 and 0.904                                                                                                     | 0.980 and 0.972                                               | 0.958 and 0.939                                                               | 0.978 and 0.969                                                              |
| Refinement method                          | Full-matrix least-squares on F <sup>2</sup>                                                                         | Full-matrix least-squares on F <sup>2</sup>                   | Full-matrix least-squares on F <sup>2</sup>                                   | Full-matrix least-squares on F <sup>2</sup>                                  |
| Data / restraints / parameters             | 10160 / 0 / 573                                                                                                     | 6287 / 0 / 463                                                | 7409 / 0 / 481                                                                | 8762 / 1 / 491                                                               |
| Goodness-of-fit on F <sup>2</sup>          | 1.031                                                                                                               | 1.030                                                         | 1.184                                                                         | 1.098                                                                        |
| Final R indices [I>2 sigma (I)]            | R <sub>1</sub> = 0.0604, wR <sub>2</sub> = 0.1465                                                                   | R <sub>1</sub> = 0.0837, wR <sub>2</sub> = 0.2365             | R <sub>1</sub> = 0.1064, wR <sub>2</sub> = 0.2890                             | R <sub>1</sub> = 0.0730, wR <sub>2</sub> = 0.2154                            |
| R indices (all data)                       | R <sub>1</sub> = 0.1009, wR <sub>2</sub> = 0.0693                                                                   | R <sub>1</sub> = 0.0933, wR <sub>2</sub> = 0.2499             | R <sub>1</sub> = 0.1257, wR <sub>2</sub> = 0.3093                             | R <sub>1</sub> = 0.1085, wR <sub>2</sub> = 0.2364                            |
| Largest diff. peak                         | 0.663 and -0.386                                                                                                    | 0.482 and -0.368                                              | 0.619 and -0.400                                                              | 0.858 and -0.467                                                             |

and hole( $e\cdot\text{\AA}^{-3}$ )

### Compound 3a:

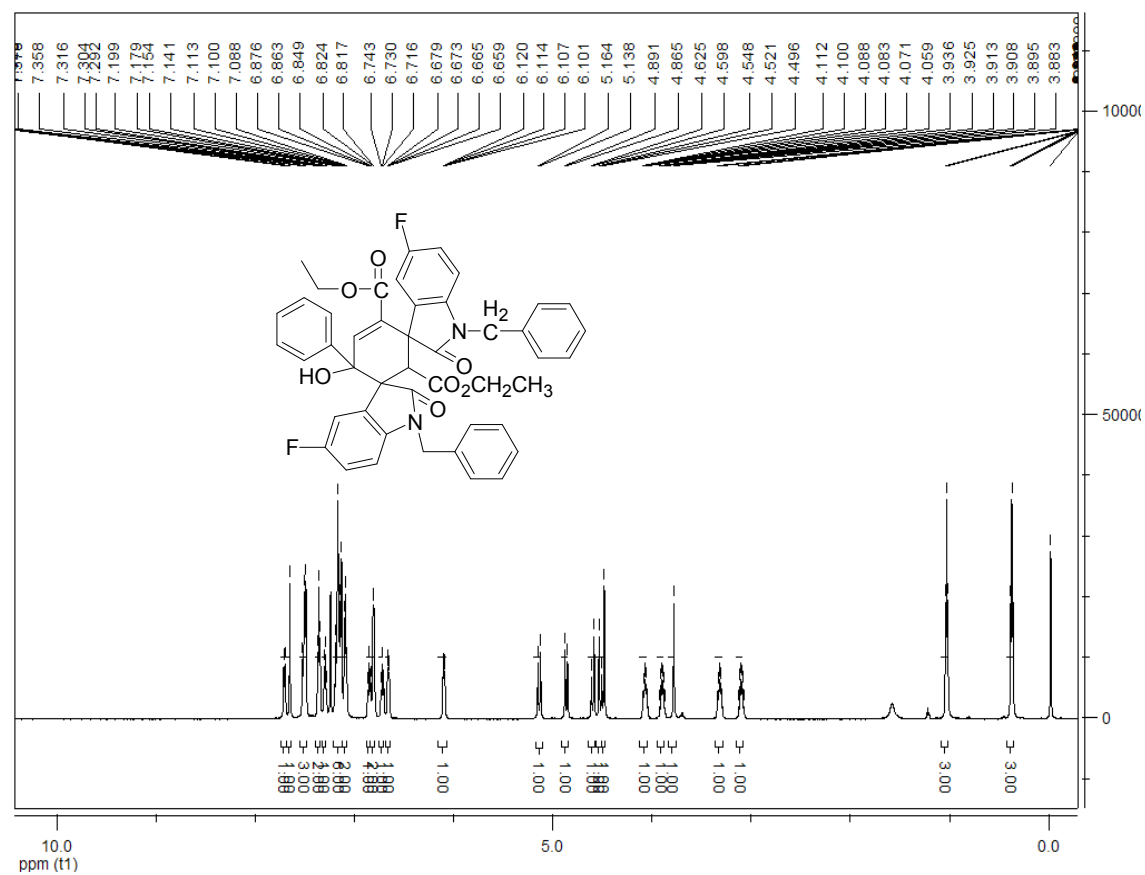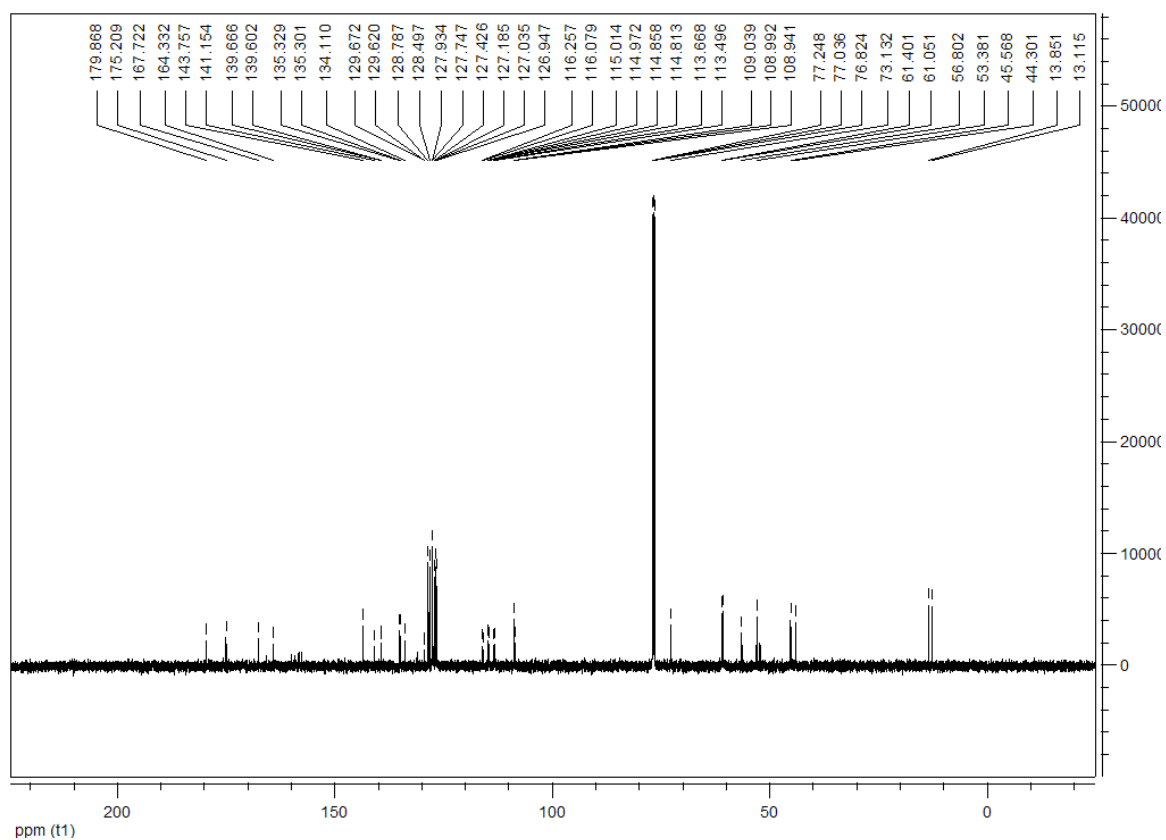



**Compound 3c:**

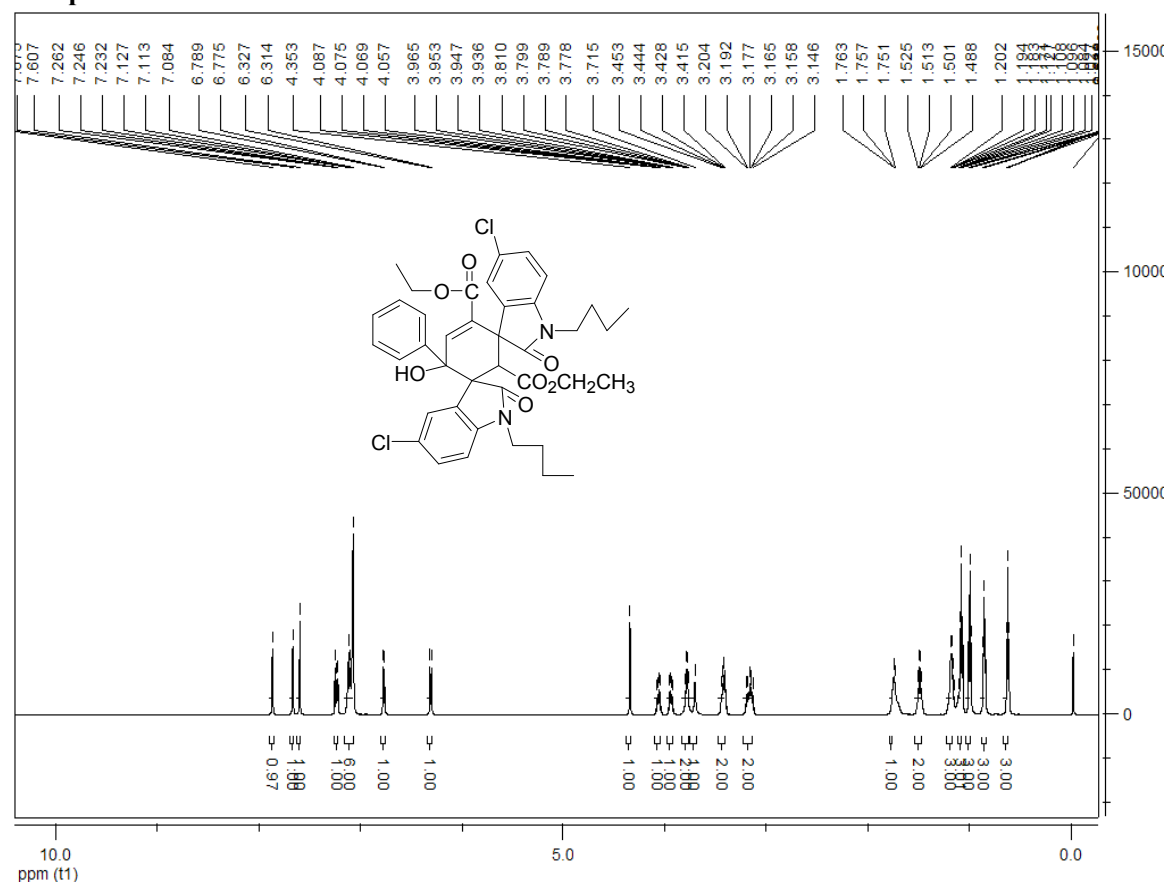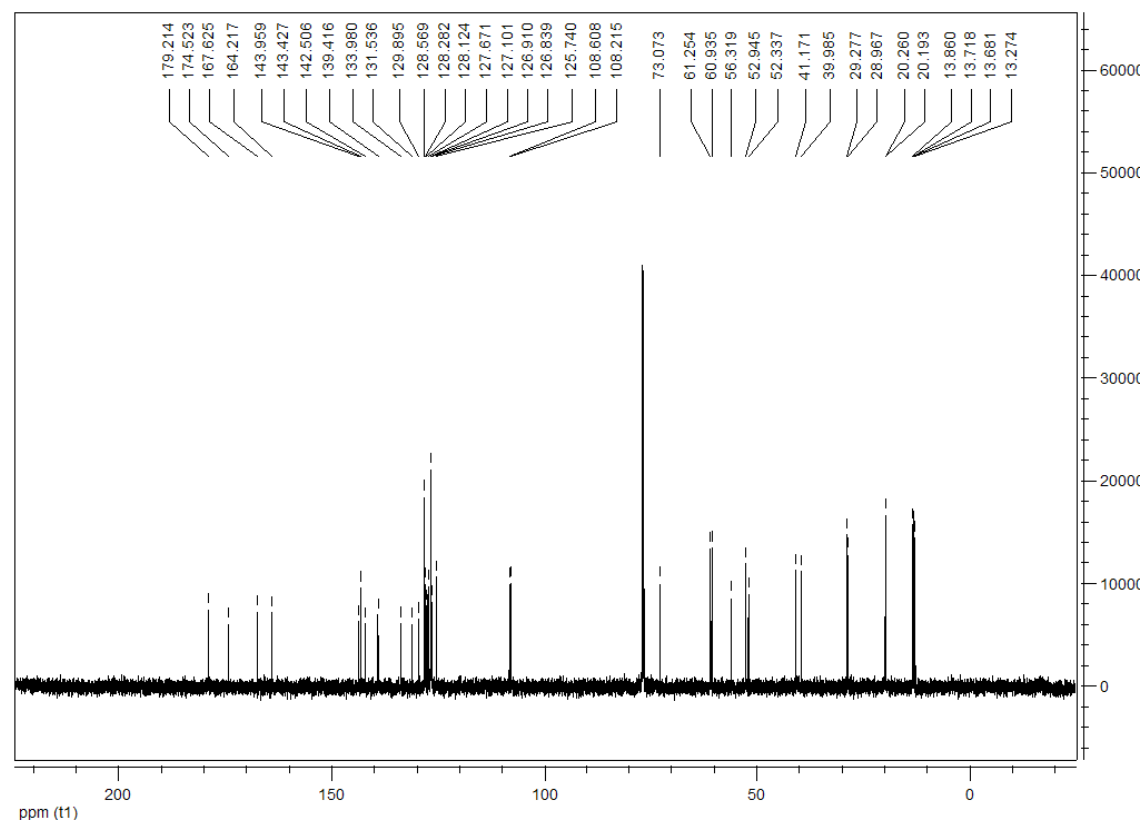



**Compound 3e:**

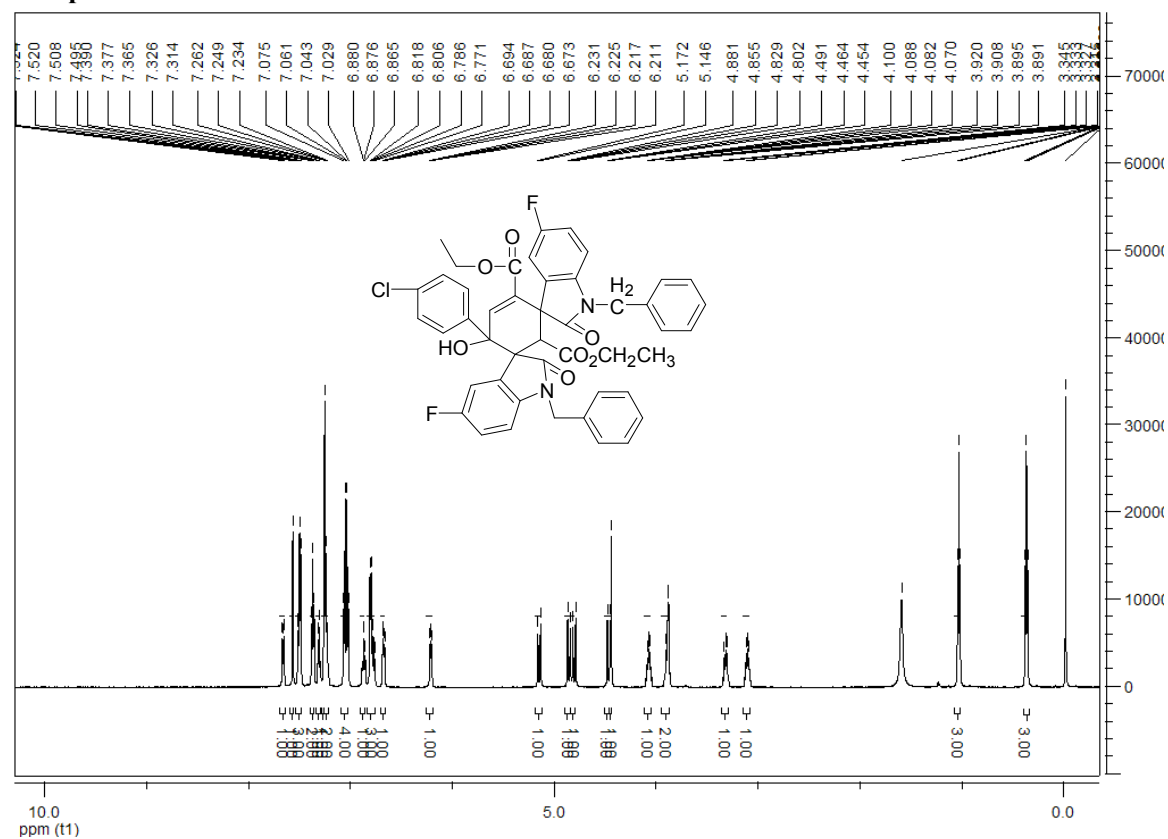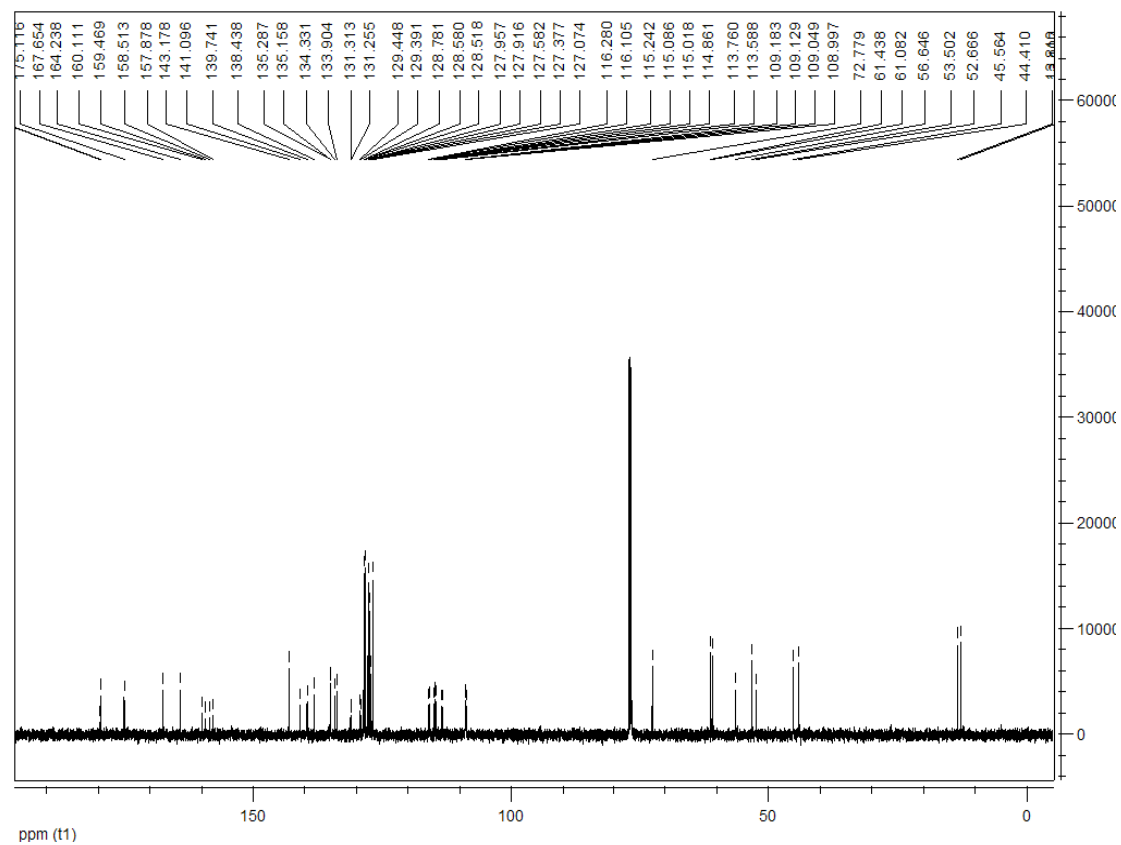











**Compound 3j:**

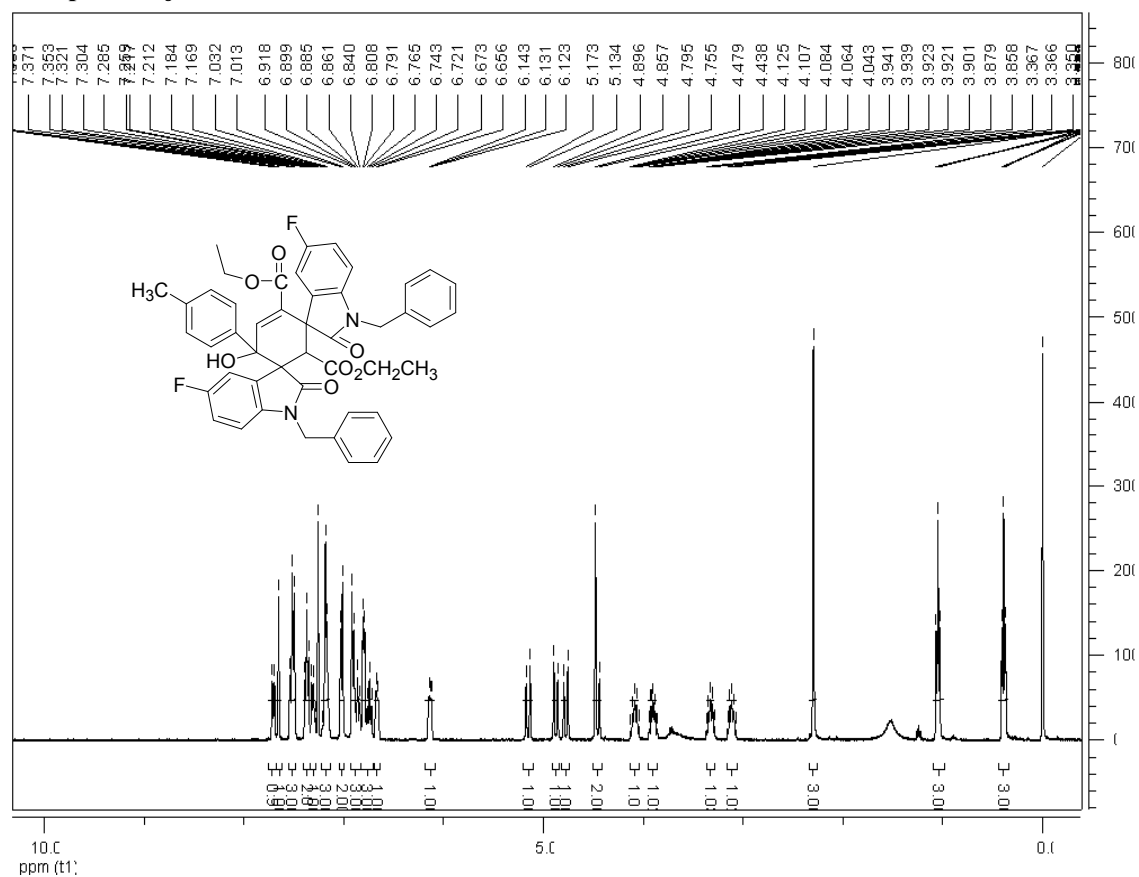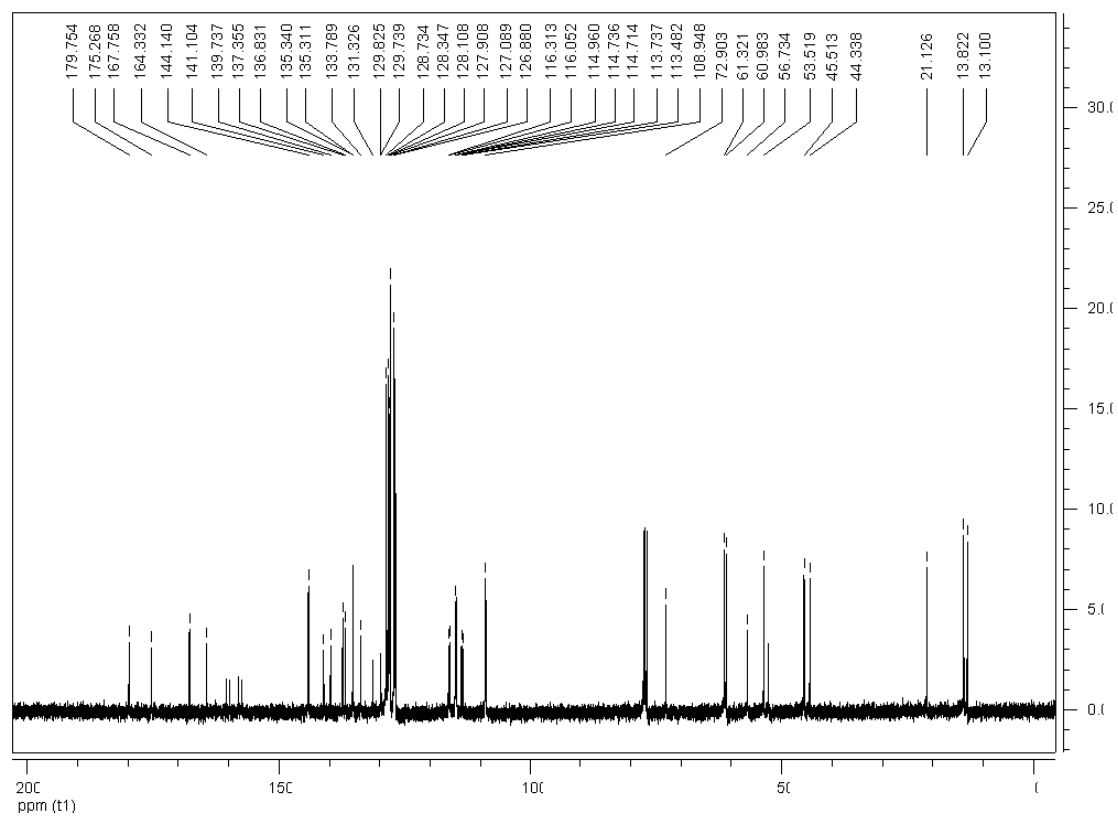





**Compound 3m:**

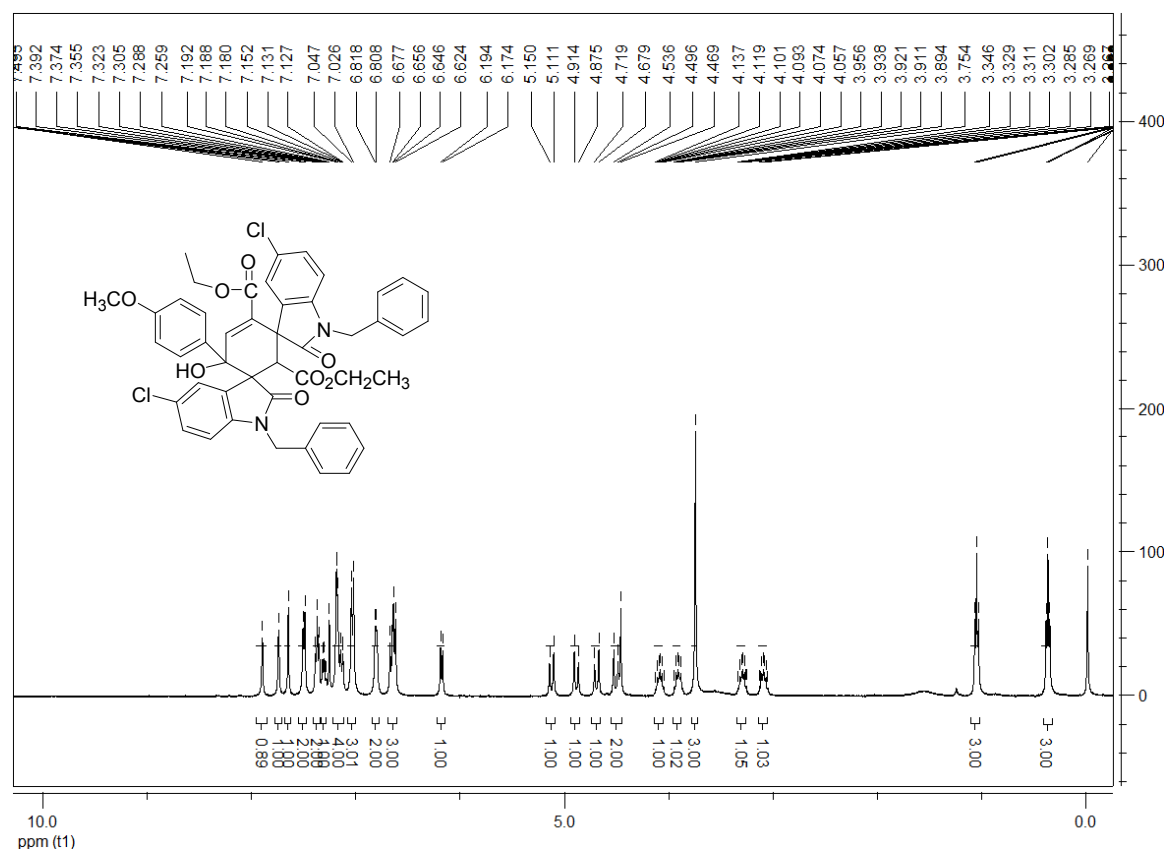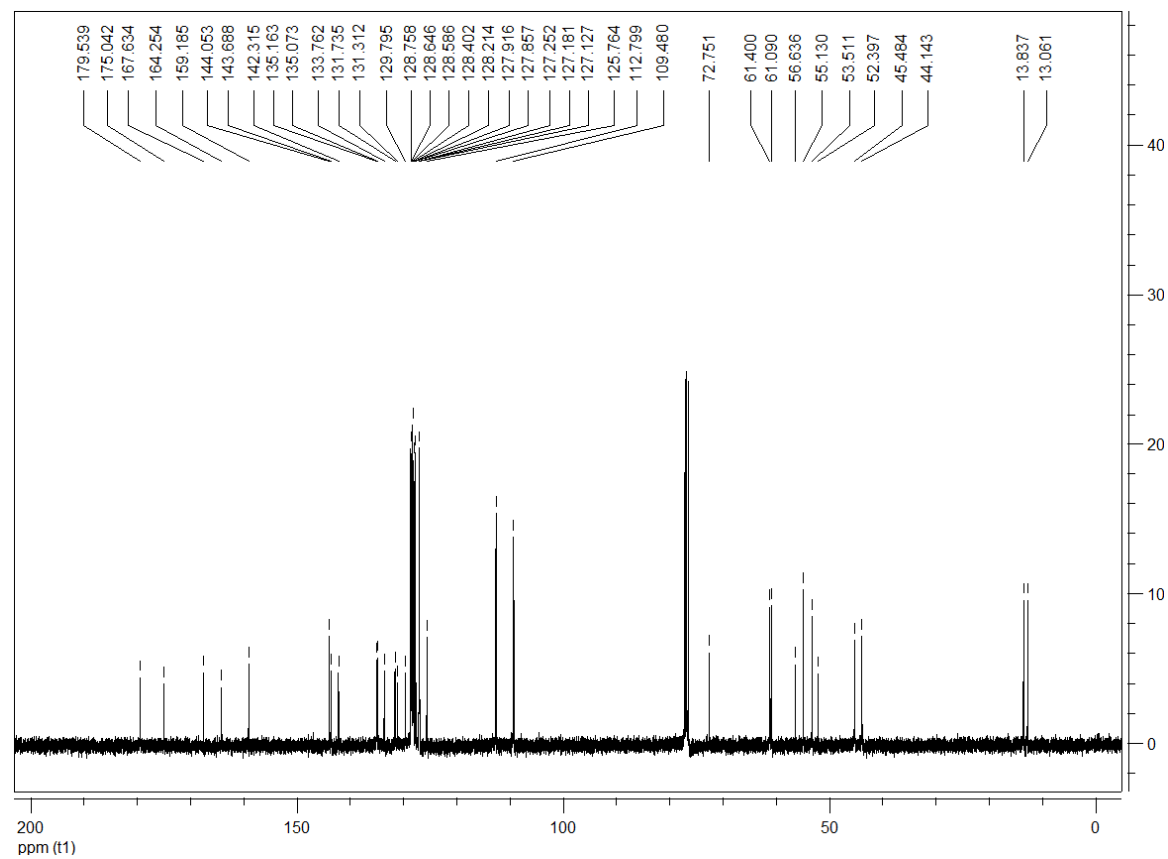



**Compound 4a:**

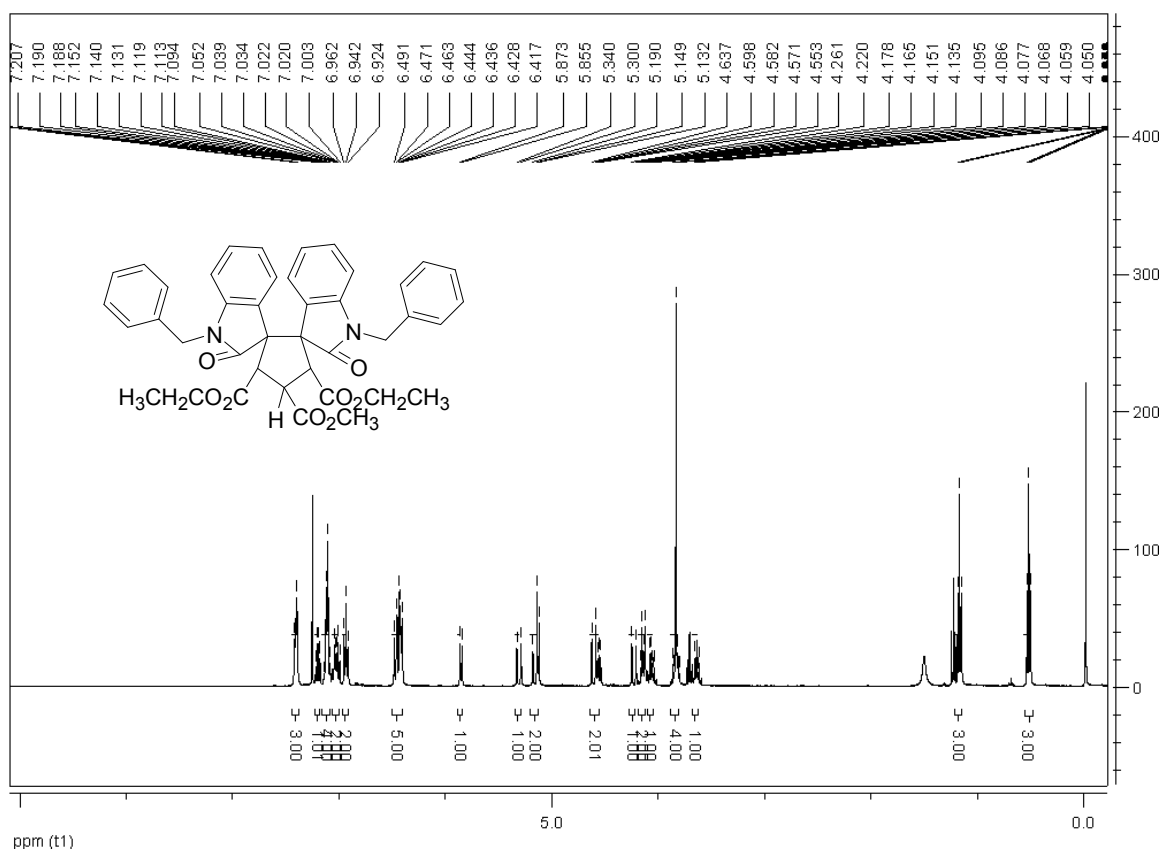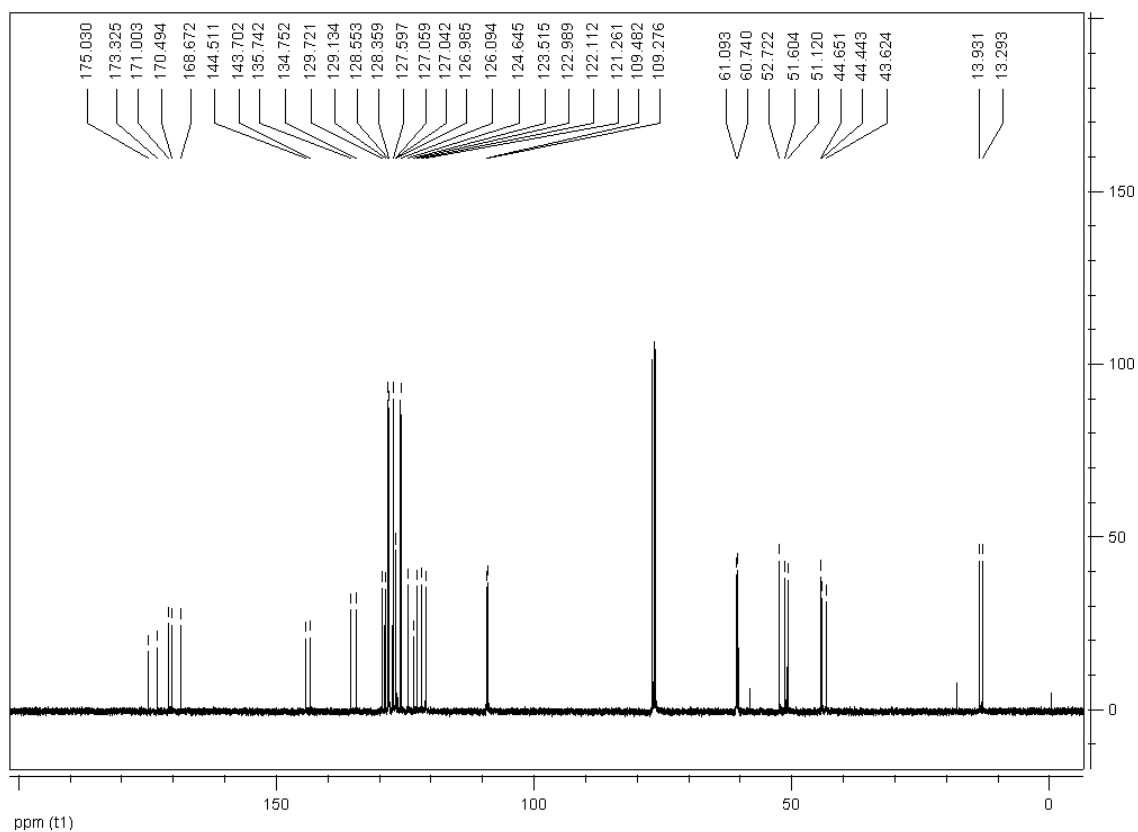

**Compound 4b:**

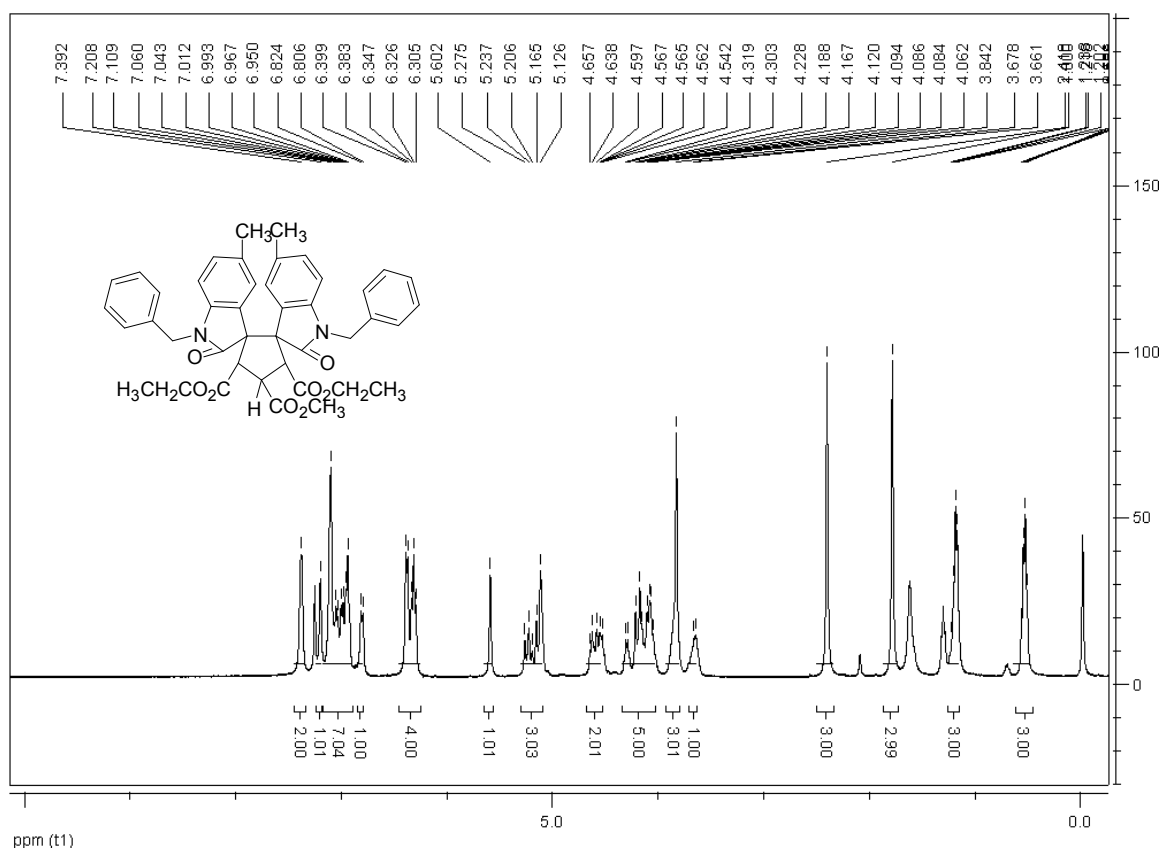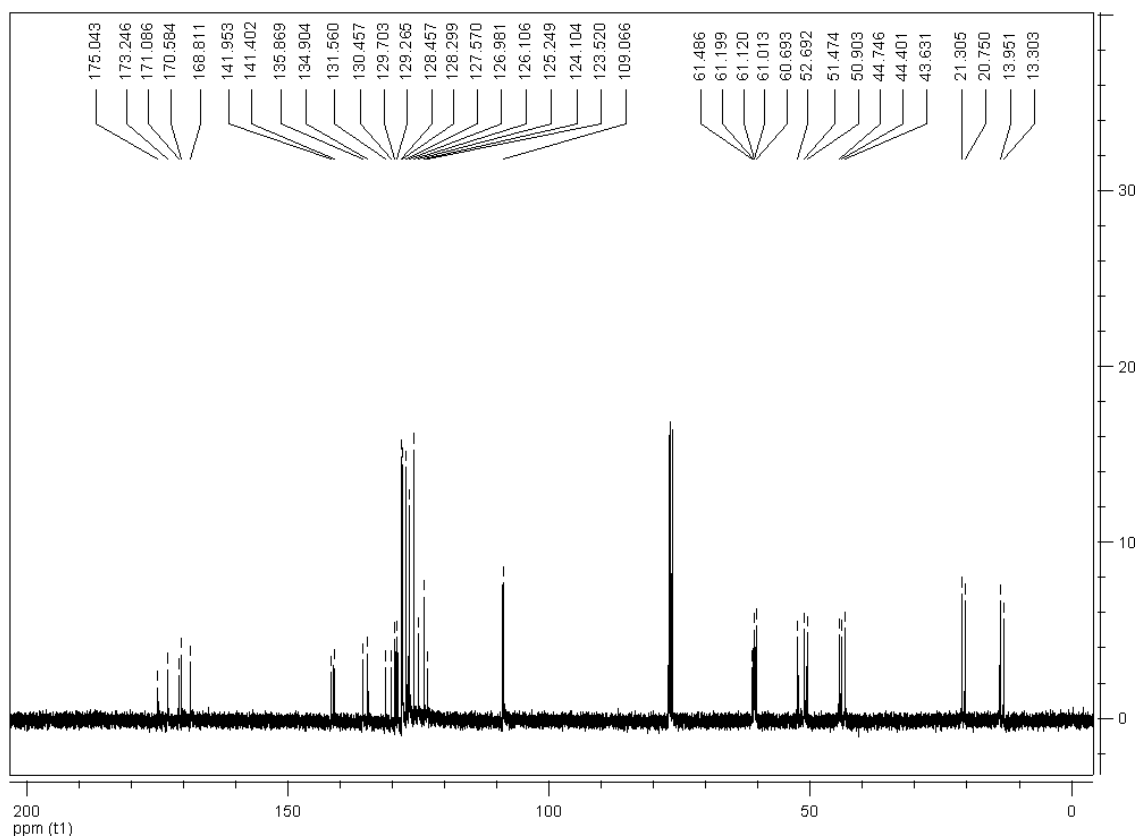

**Compound 4c:**

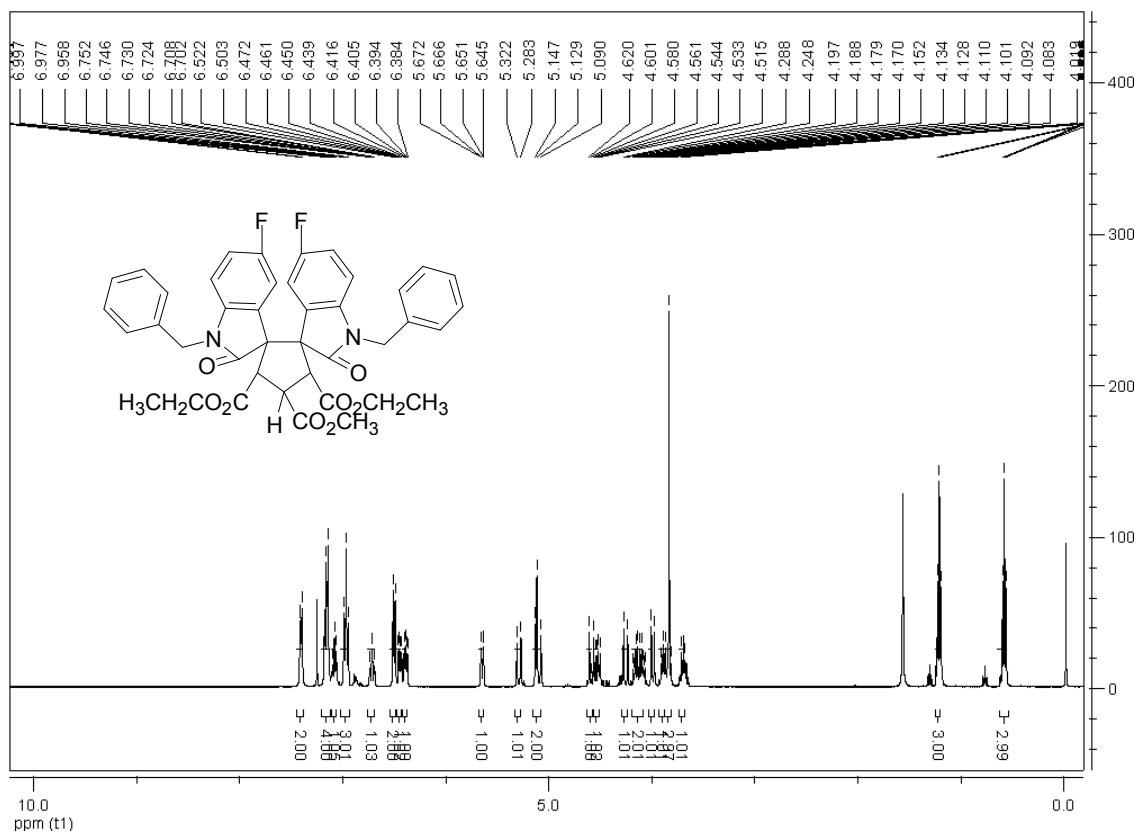

**Compound 4d:**

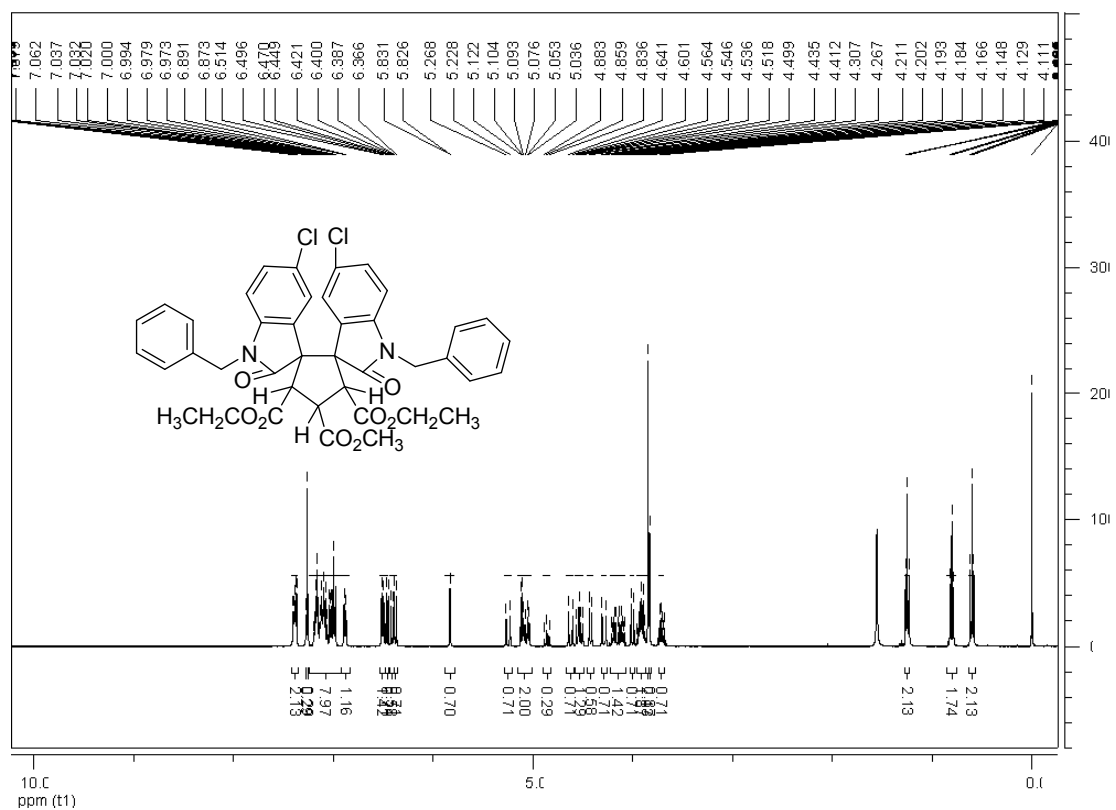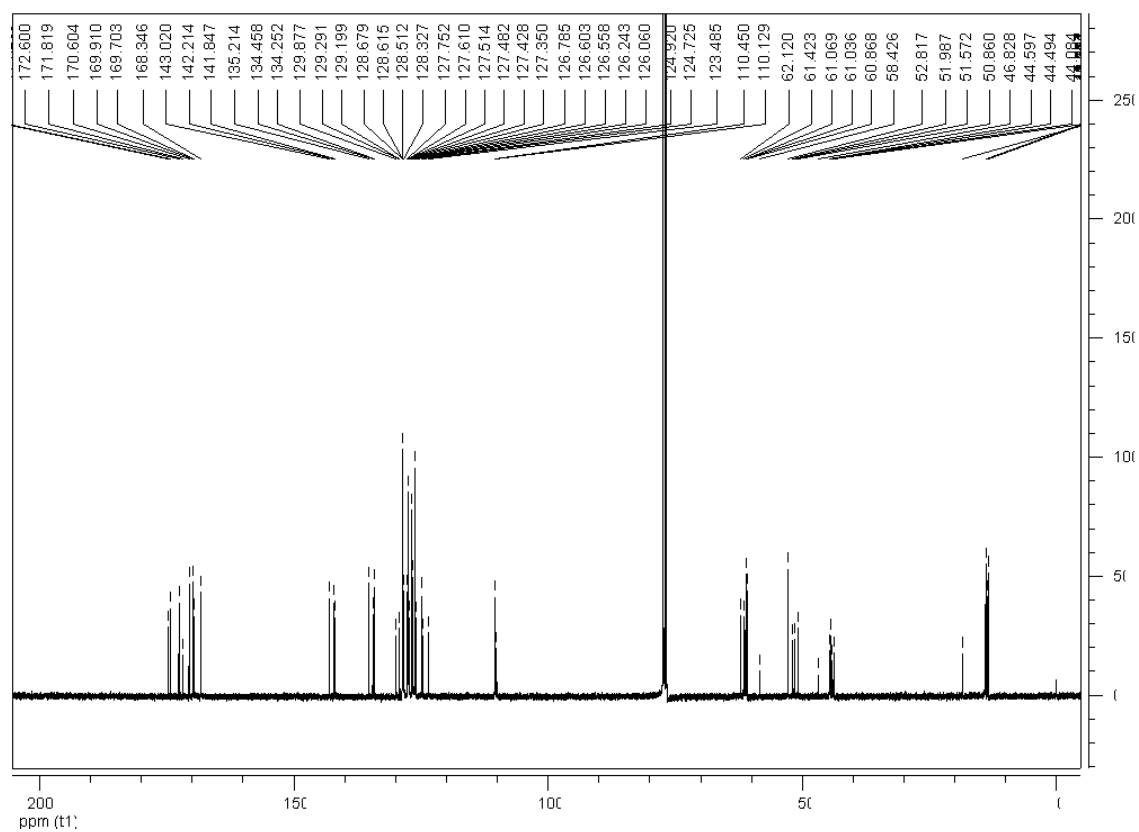

**Compound: 4e:**

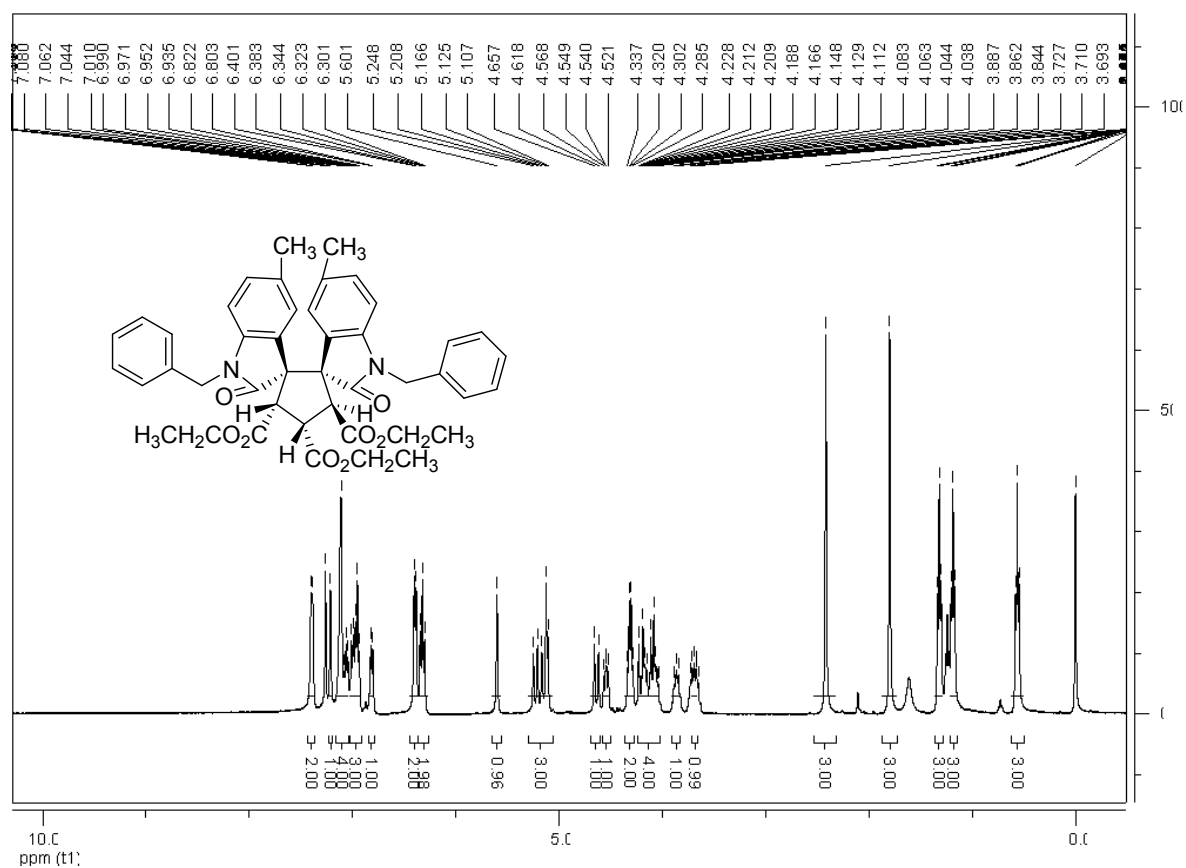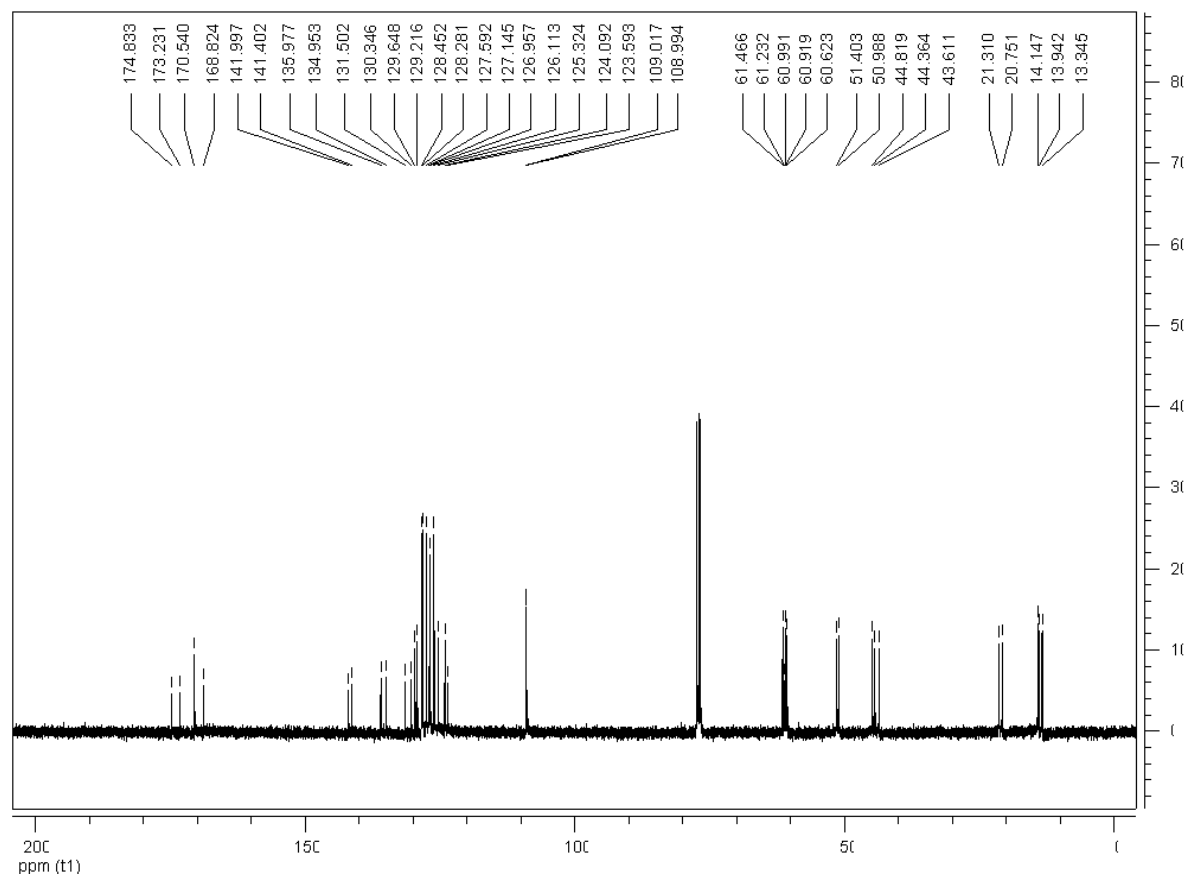

Supplement: c4ra13760d1.pdf [file c4ra13760d1.pdf]
